# Supplementary material
Source: PubMed Central journal article supplement (PMC2330294)
Supplement: plntphys_pp.107.114546_1.pdf [file plntphys_pp.107.114546_1.pdf]

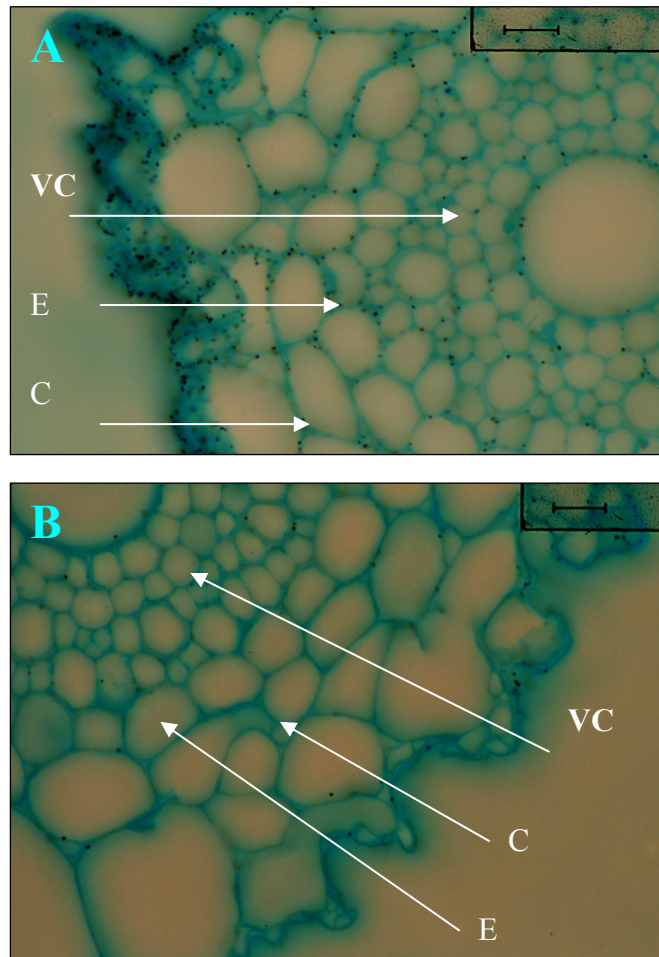

**Supplemental Figure S1.** A, a detail of an antisense and B, a sense *in situ* hybridization showing that *HvHAK1* transcripts accumulate in most root cells and not only in the outermost layers. The expression of *HvHAK1* is indicated by dark granules. Bars correspond to 20  $\mu\text{m}$ . C, cortex; E, endodermis; VC, vascular cylinder.
