# Supplementary material
Source: PubMed Central journal article supplement (PMC2330294)
Supplement: plntphys_pp.107.114546_2.pdf [file plntphys_pp.107.114546_2.pdf]

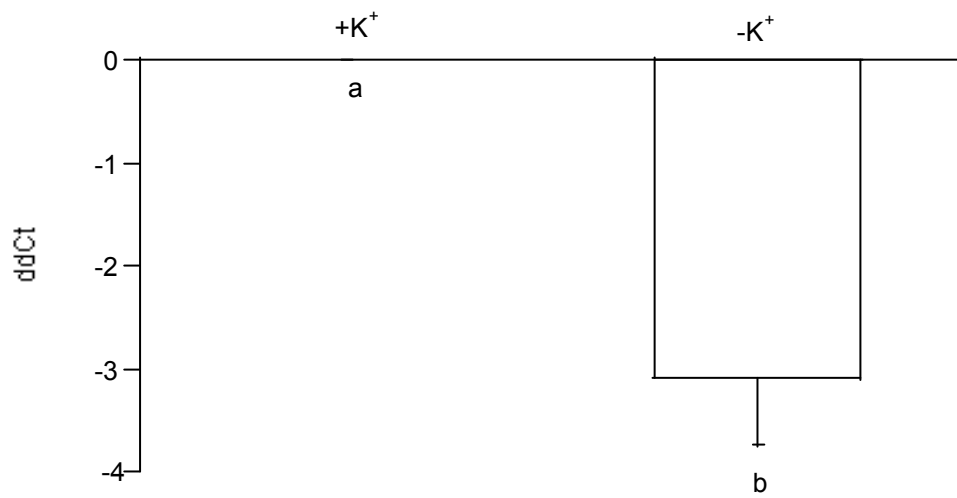

**Supplemental Figure S2.** Accumulation of *HvHAK1* transcripts in 1 week old plants grown in MES-Ca<sup>2+</sup> solution, without aeration, in the presence or the absence of 1mM KCl (n=5). Delta-delta Ct corresponds to the difference in transcript accumulation between the presence of K<sup>+</sup> (control condition) and its absence (no K<sup>+</sup> added). Different letters indicate significantly different values (P<0.005).
