# Supplementary material
Source: PubMed Central journal article supplement (PMC2330294)
Supplement: plntphys_pp.107.114546_3.pdf [file plntphys_pp.107.114546_3.pdf]

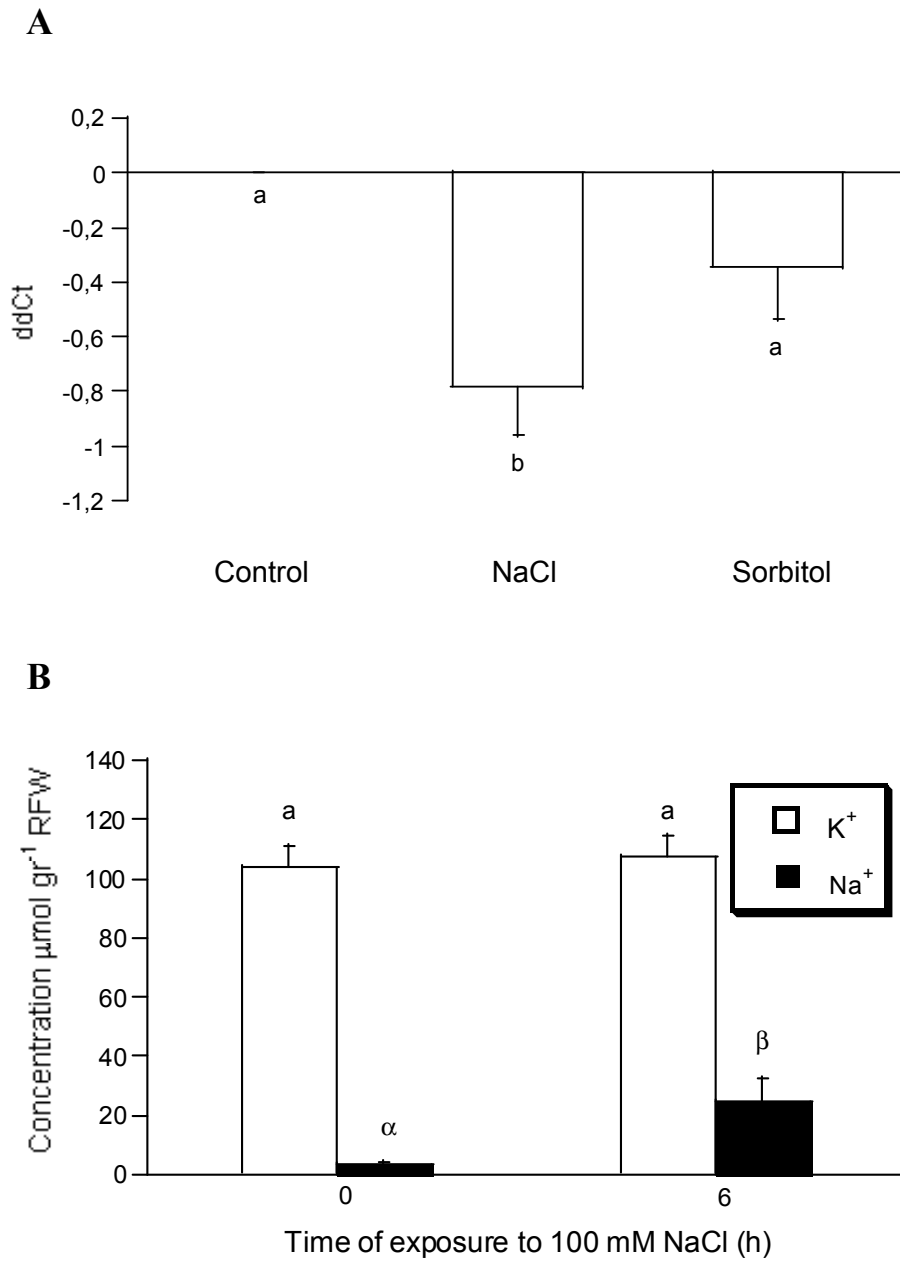

**Supplemental Figure S3.** A, Comparative effect of a 6 h exposure to 100 mM NaCl and 200 mM Sorbitol on the accumulation of *HvHAK1* transcripts (n= 12). B, Effect of the exposure to 100 mM NaCl on the concentration of K<sup>+</sup> and Na<sup>+</sup> in roots (n=6). Different letters indicate significantly different values (P<0.05 and P<0.001 for A and B, respectively).
