# Supplementary material
Source: PubMed Central journal article supplement (PMC2330294)
Supplement: plntphys_pp.107.114546_4.pdf [file plntphys_pp.107.114546_4.pdf]

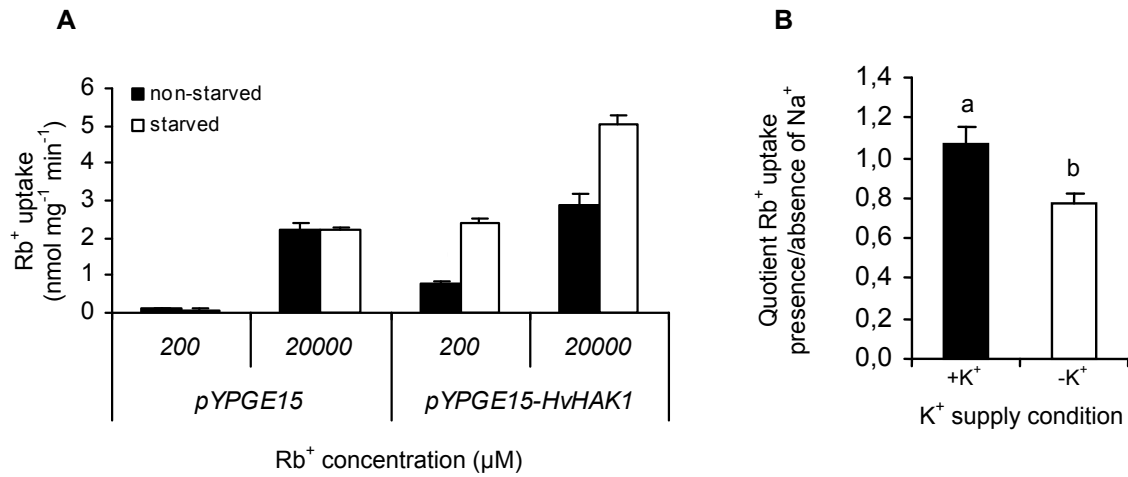

**Supplemental Figure S4.** Rb<sup>+</sup> uptake properties by yeast cells expressing *HvHAK1* following K<sup>+</sup> withdrawal.

A, Rb<sup>+</sup> uptake by yeast cells transformed with an empty vector (*pYPGE15*) or with the same vector containing *HvHAK1* was measured at 200 µM and 20000 µM Rb<sup>+</sup> (n=5). No additional enhancement of Rb<sup>+</sup> uptake due to the expression of *HvHAK1* was observed at 20000 µM Rb<sup>+</sup> over that observed at 200 µM Rb<sup>+</sup> for both K<sup>+</sup> starved and K<sup>+</sup> non-starved cells. B, relative inhibitory effect of NaCl 100 mM on Rb<sup>+</sup> uptake (n=14) for K<sup>+</sup> starved and K<sup>+</sup> non-starved cells. Error bars represent ± SE. Different letters indicate significantly different values as estimated by a t-Test (P<0.01).
